# Supplementary material for: Integrated RNA-seq and DNase-seq analyses identify phenotype-specific BMP4 signaling in breast cancer
Source: PubMed Central journal article supplement (PMC5225521; doi:10.1186/s12864-016-3428-1), 2017-01-11

# MDA-MB-231: SMAD4 silencing

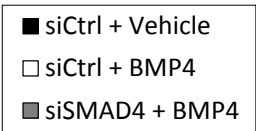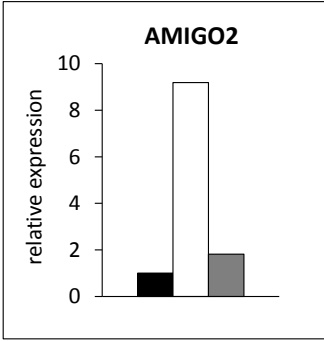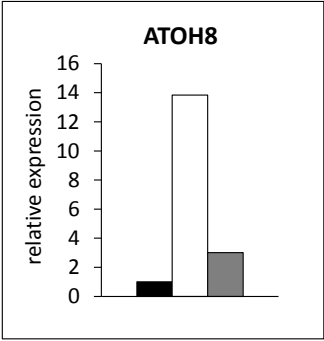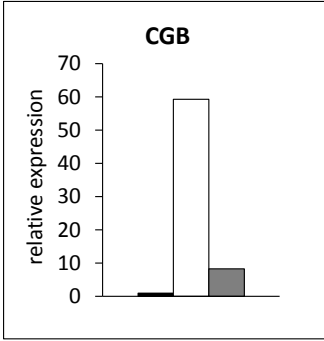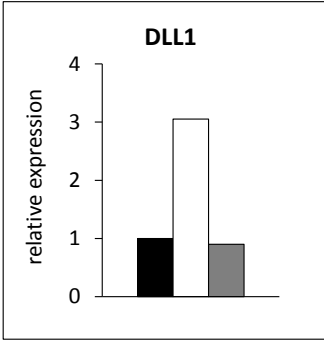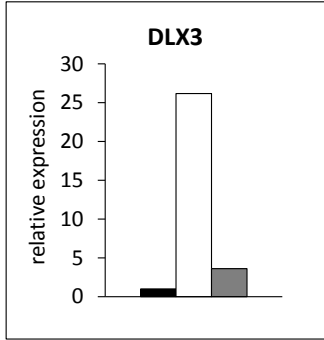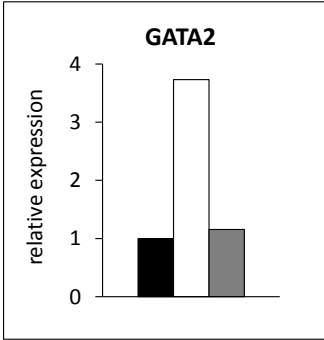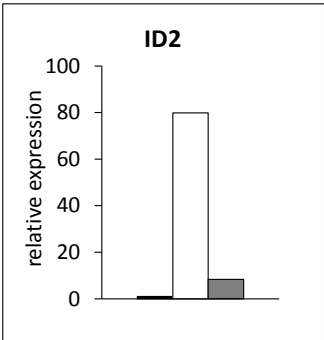

IGFBP3  
data missing

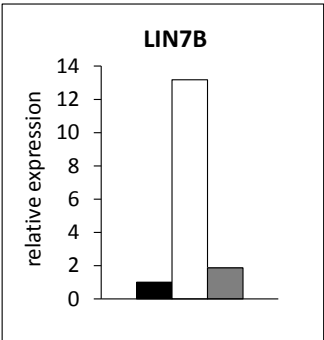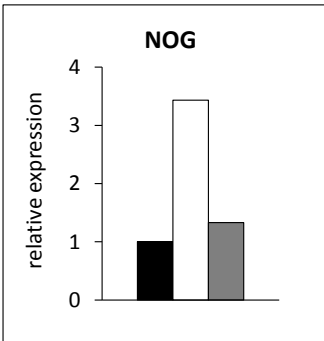

PMEPA1  
not applicable

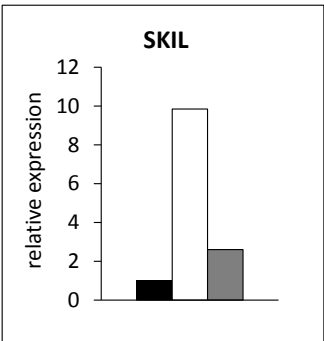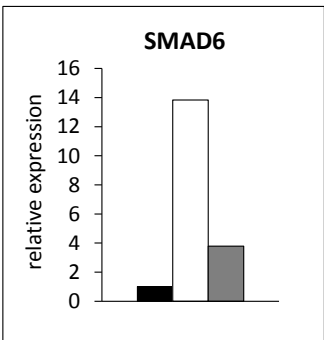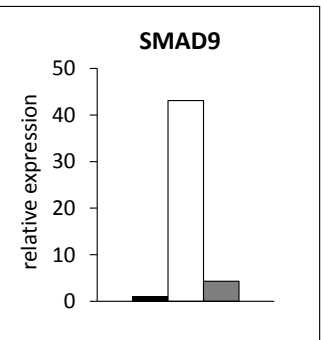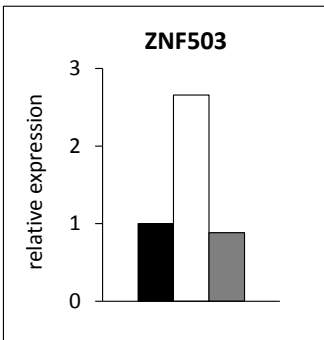

# T-47D: SMAD4 silencing



AMIGO2  
not applicable

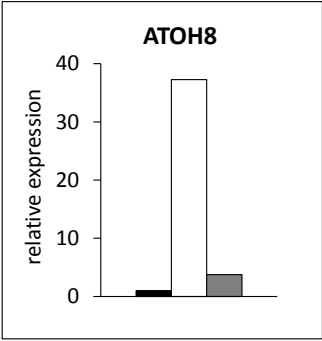

CGB  
not applicable

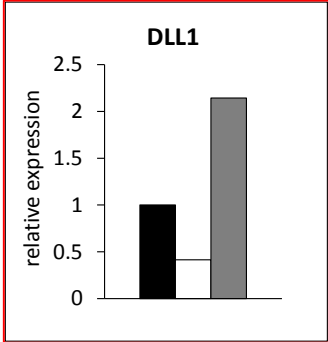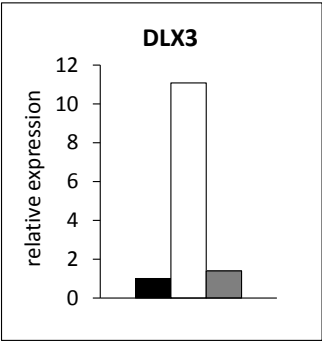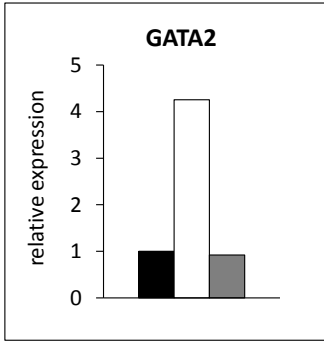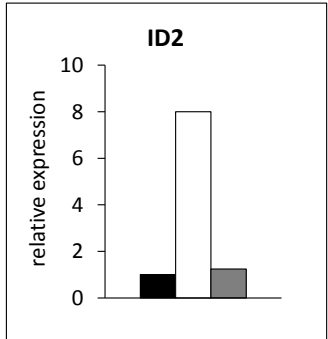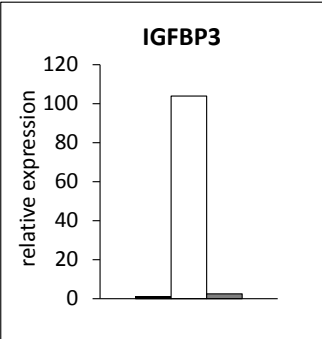

LIN7B  
data missing

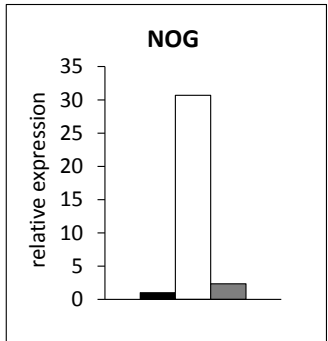

PMEP1  
not applicable

SKIL  
data missing

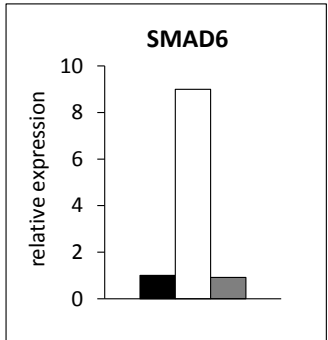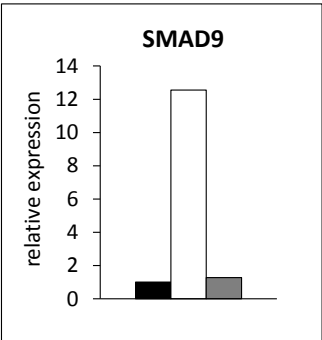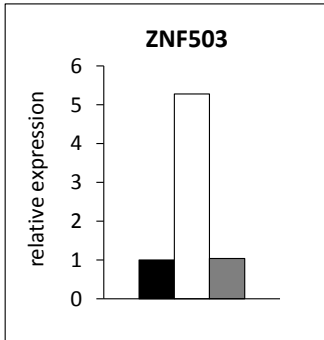

# MDA-MB-231: MBD2 silencing

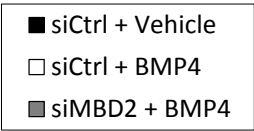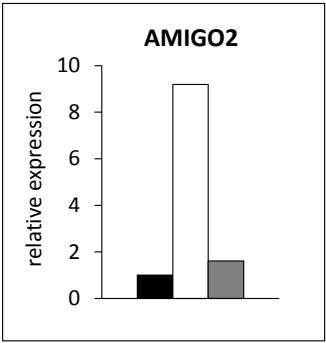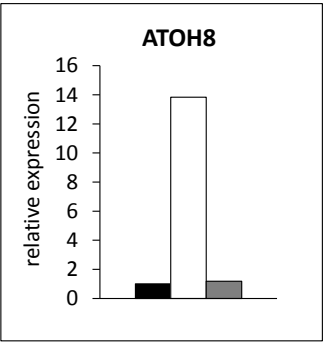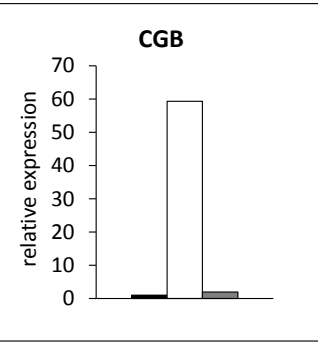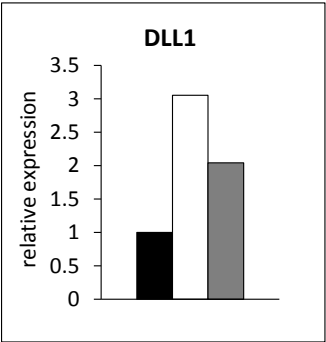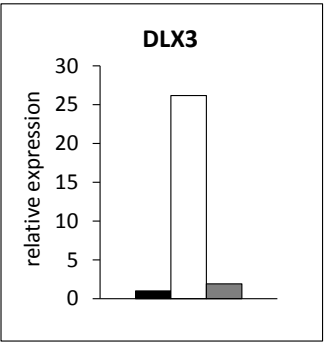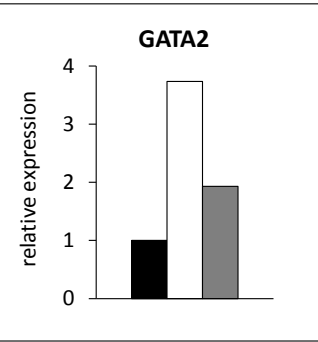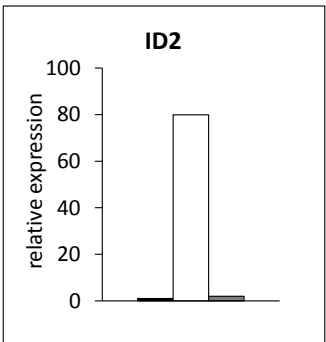

IGFBP3  
data missing

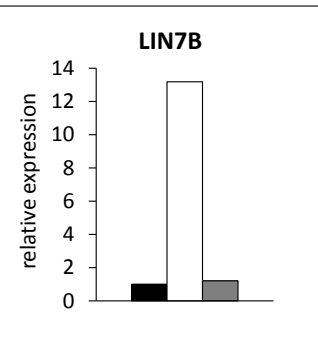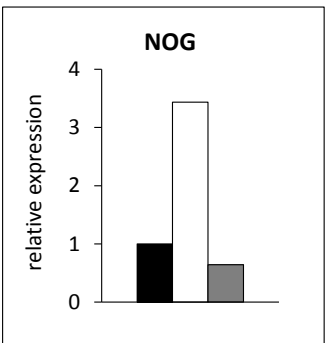

PMEPA1  
not applicable

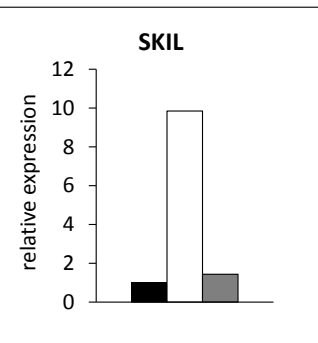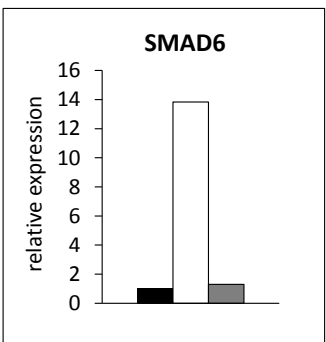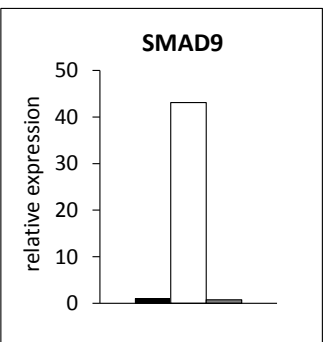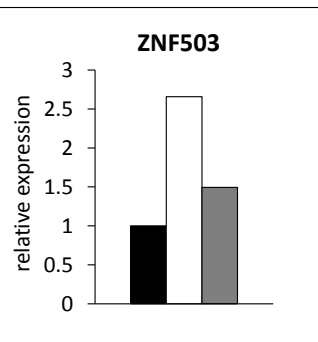

# T-47D: MBD2 silencing

■ siCtrl + Vehicle  
□ siCtrl + BMP4  
■ siMBD2 + BMP4

AMIGO2  
not applicable

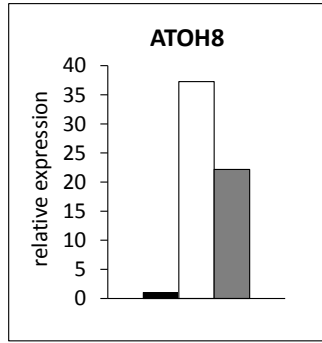

CGB  
not applicable

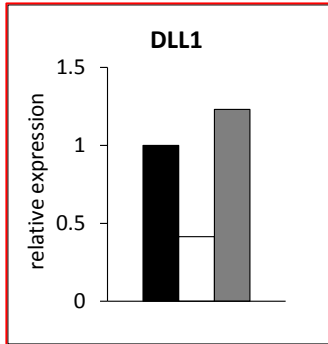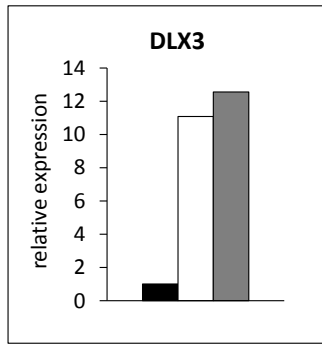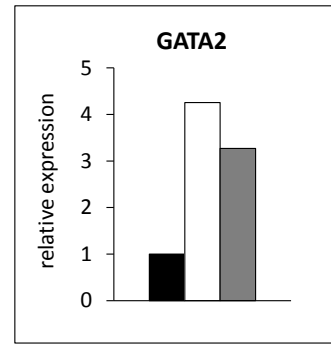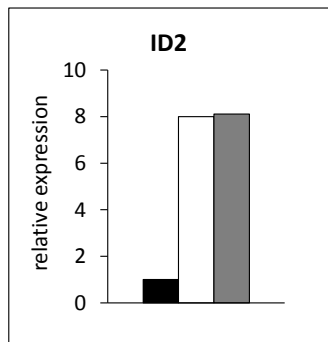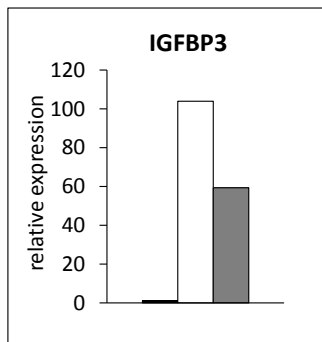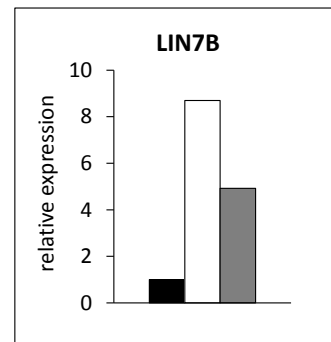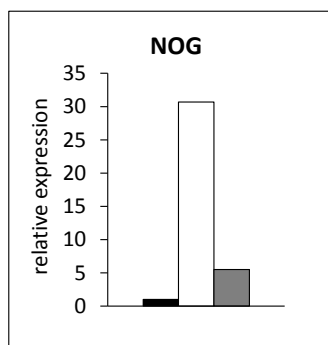

PMEPA1  
not applicable

SKIL  
data missing

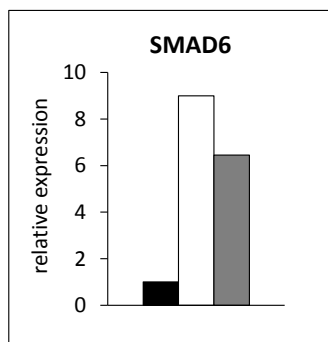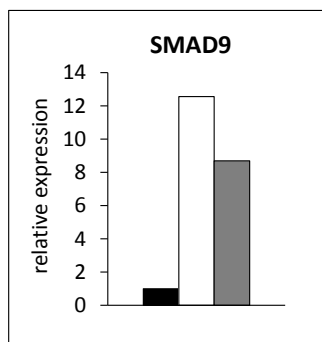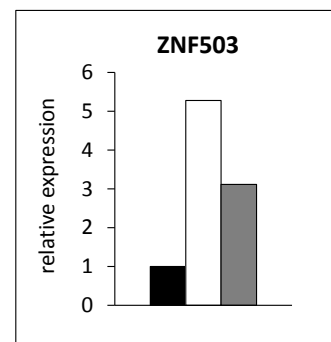

# MDA-MB-231: CBFB silencing

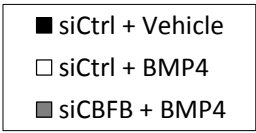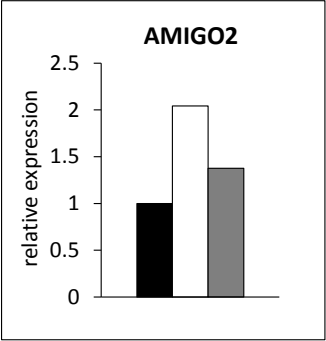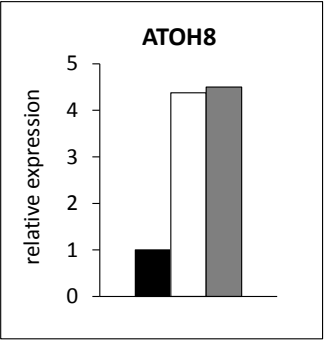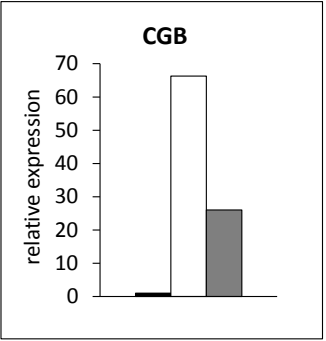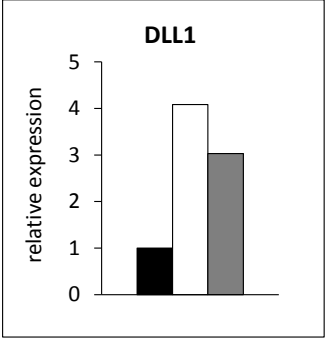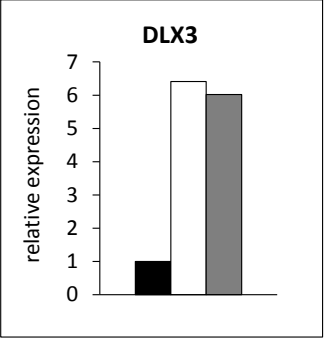

GATA2  
data missing

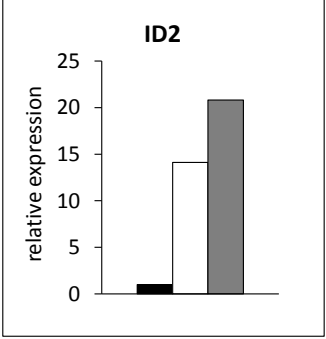

IGFBP3  
data missing

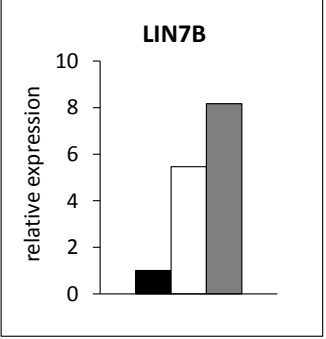

NOG  
data missing

PMEPA1  
not applicable

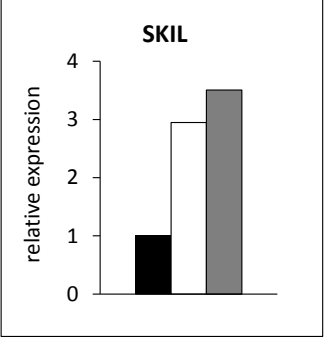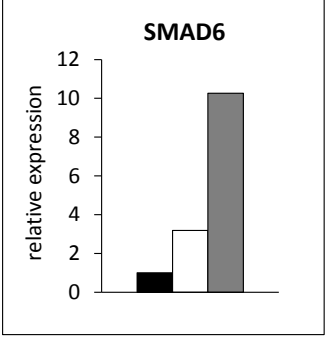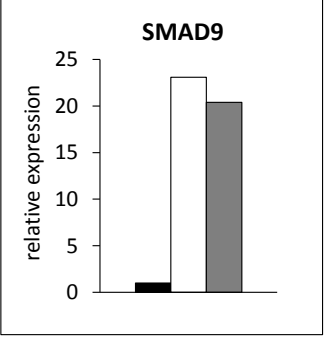

ZNF503  
data missing

# T-47D: CFBF silencing

- siCtrl + Vehicle
- siCtrl + BMP4
- siCBFB + BMP4

AMIGO2  
not applicable

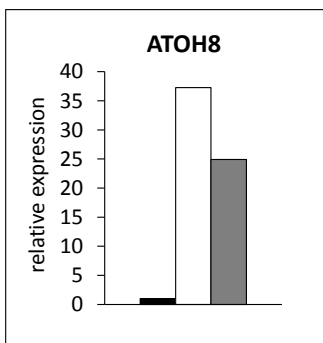

CGB  
not applicable

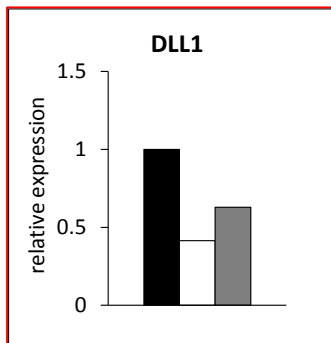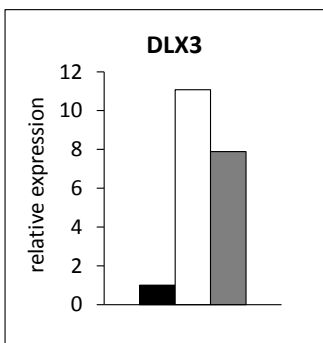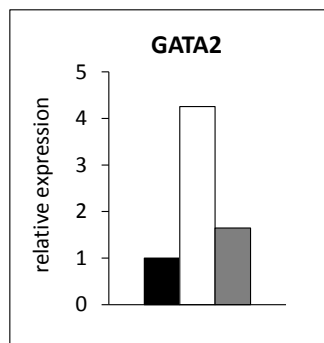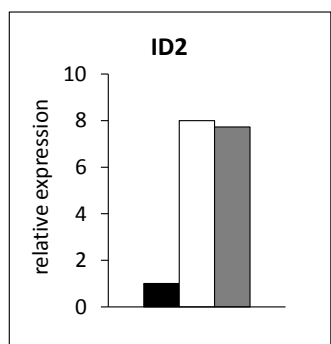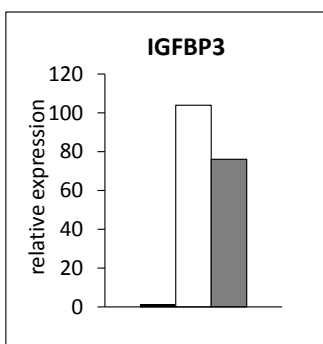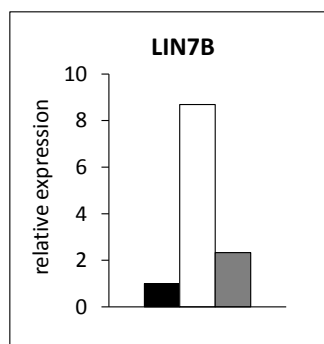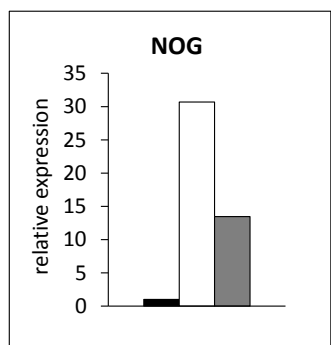

PMEPA1  
not applicable

SKIL  
data missing

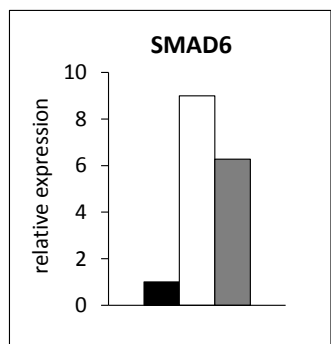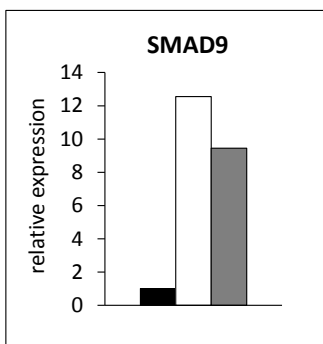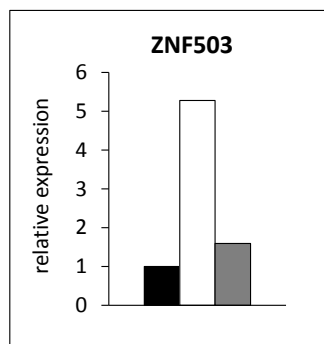

# MDA-MB-231: HIF1A silencing

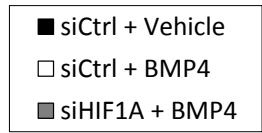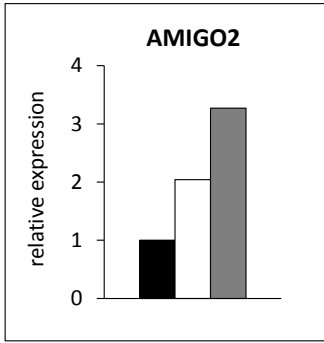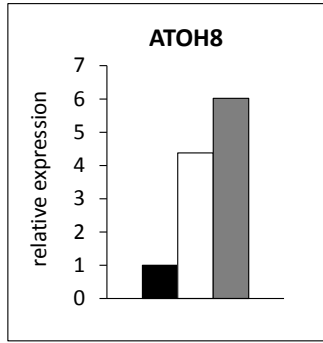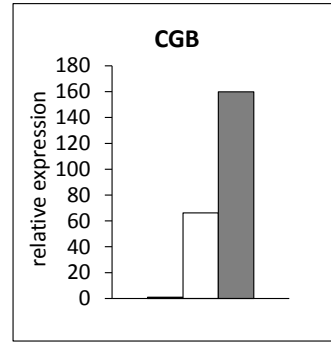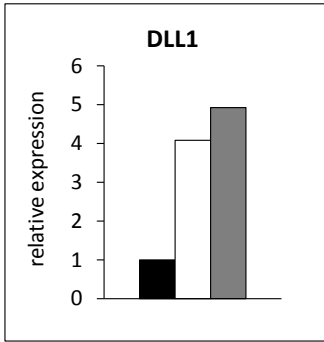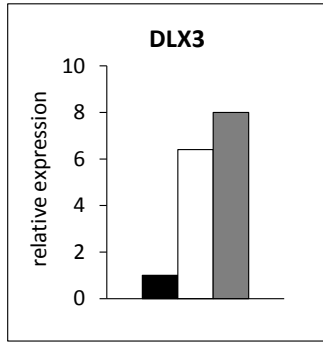

GATA2  
data missing

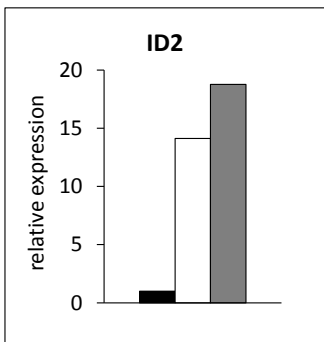

IGFBP3  
data missing

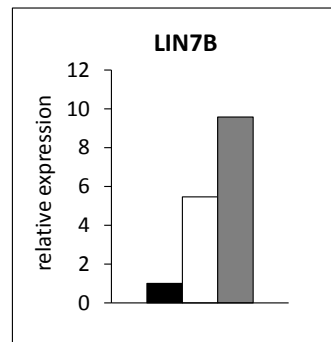

NOG  
data missing

PMEPA1  
not applicable

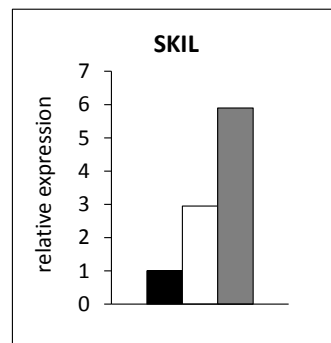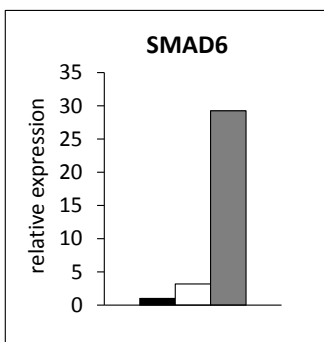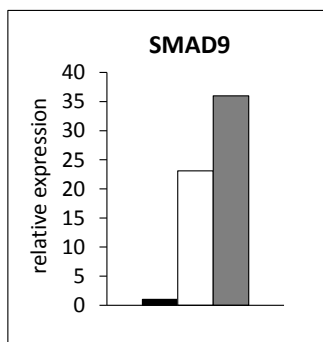

ZNF503  
data missing

# T-47D: HIF1A silencing

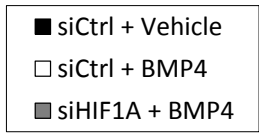

AMIGO2  
not applicable

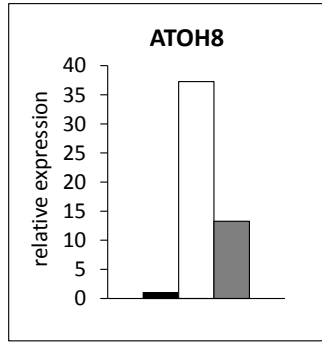

CGB  
not applicable

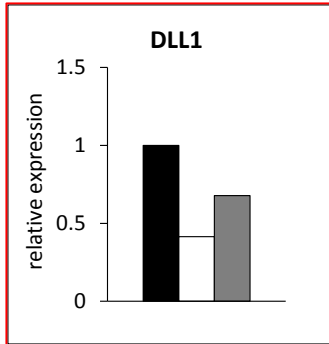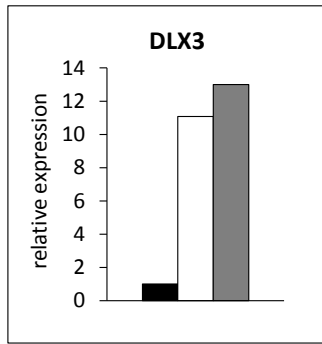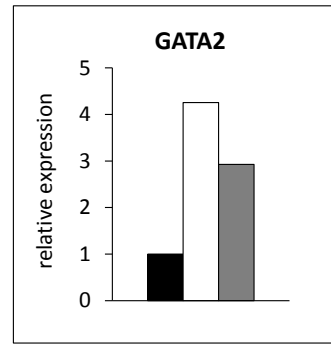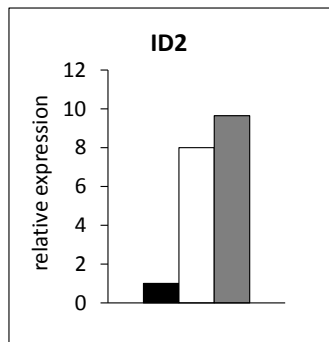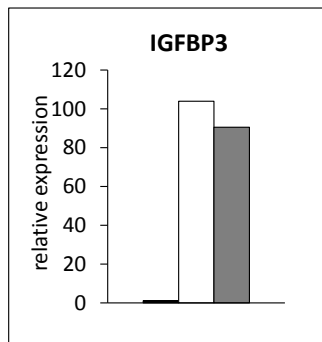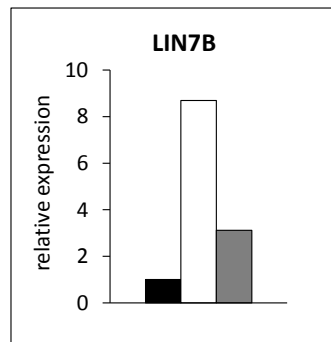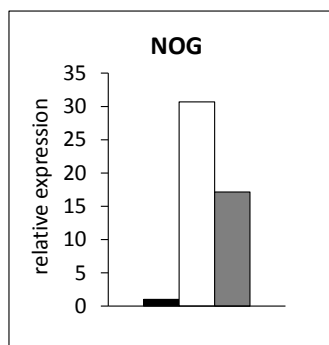

PMEPA1  
not applicable

SKIL  
data missing

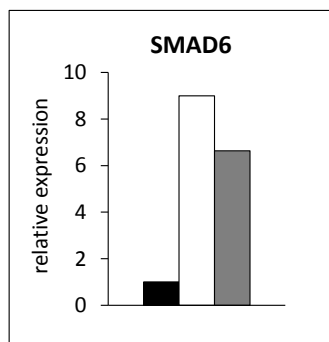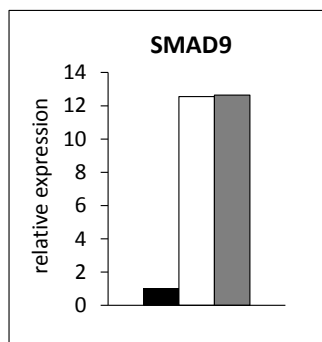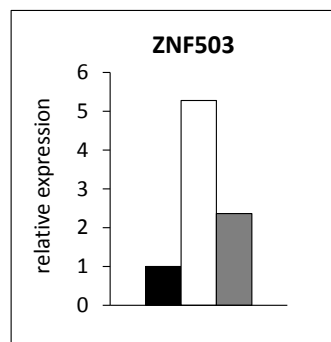

Supplement: 12864_2016_3428_MOESM8_ESM.pdf [file 12864_2016_3428_MOESM8_ESM.pdf]
