# Supplementary material for: Integrated RNA-seq and DNase-seq analyses identify phenotype-specific BMP4 signaling in breast cancer
Source: PubMed Central journal article supplement (PMC5225521; doi:10.1186/s12864-016-3428-1), 2017-01-11

MDA-MB-231 peak distribution

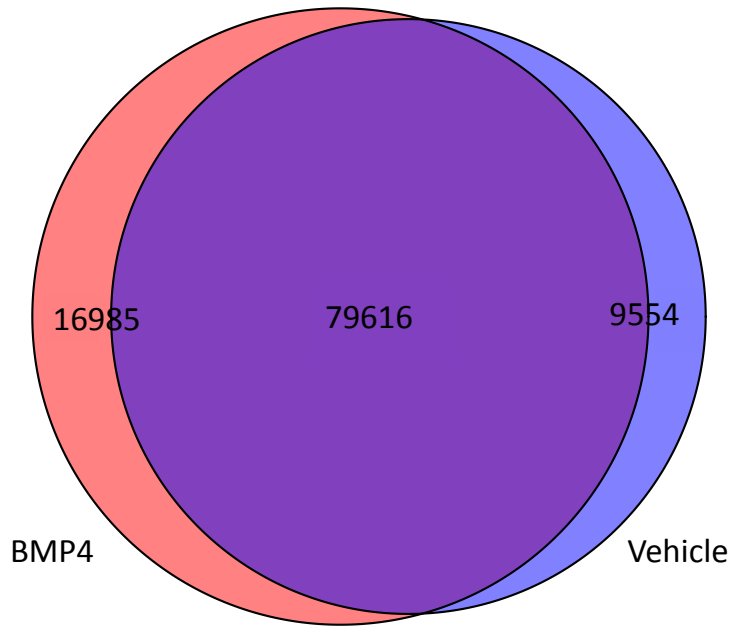

T-47D peak distribution

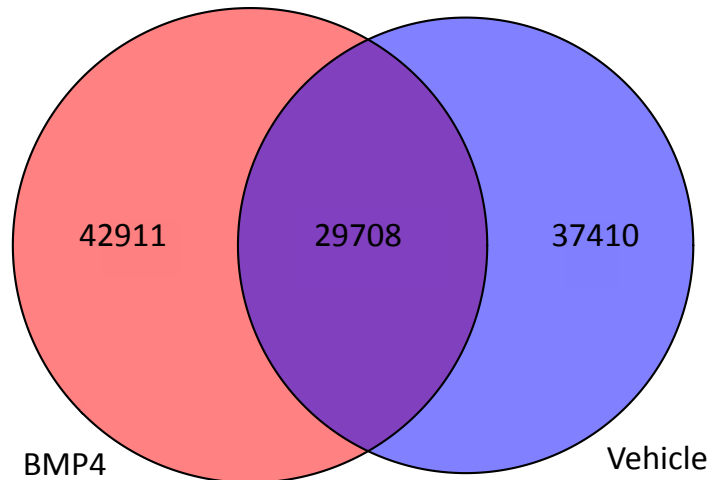

Supplement: 12864_2016_3428_MOESM6_ESM.pdf [file 12864_2016_3428_MOESM6_ESM.pdf]
