# Supplementary material for: Integrated RNA-seq and DNase-seq analyses identify phenotype-specific BMP4 signaling in breast cancer
Source: BMC Genomics. 2017 Jan 11;18:68. doi: 10.1186/s12864-016-3428-1 (PMC5225521; doi:10.1186/s12864-016-3428-1)
Supplement: Additional file 4: Table S3. — Survival analysis of DEGs in MDA-MB-231. Table S4. Survival analysis of DEGs in T-47D. Each differentially expressed protein - coding gene was tested for possible association with the survival of breast cancer patients based on the gene expression data obtained from The Cancer Genome Atlas (TCGA). Blue background indicates DEGs shared by both cell lines. Benjamini-Hochberg corrected P-values are shown. No diff. = no association with survival. Not available = not found in TCGA data. (XLSX 16 kb) [file 12864_2016_3428_MOESM4_ESM.xlsx]

## Sheet: MDA-MB-231
Gene	Adj. P-value (BH)	Predicts poor survival
ZNF546	0.01275	High expression
GOLGA8G	0.01275	High expression
ATOH8	0.01275	High expression
BDKRB1	0.01275	High expression
NUAK2	0.01275	Low expression
RAB6B	0.01275	High expression
SMAD6	0.0153	High expression
SYT15	0.016575	High expression
HIC1	0.01785	High expression
FGGY	0.01785	High expression
HTR1D	0.0196154	Low expression
AGAP11	0.0196154	High expression
MAGI2	0.0196154	High expression
ADAM19	0.02108	Low expression
ID3	0.02108	High expression
LRRC15	0.0252	Low expression
COL1A1	0.0252	Low expression
ANGPTL4	0.0266333	High expression
SMAD9	0.0306	High expression
ZC3H6	0.0306	High expression
IL21R	0.0558571	no diff
ID1	0.0579545	no diff
C11orf74	0.06375	no diff
CGB7	0.06375	no diff
HECW1	0.06936	no diff
C5orf56	0.0784615	no diff
AMIGO2	0.0928929	no diff
NR3C2	0.0928929	no diff
RNF144A	0.0932069	no diff
NOSTRIN	0.0986	no diff
CGB8	0.10529	no diff
CGB2	0.113156	no diff
GPRIN2	0.115909	no diff
BDKRB2	0.126771	no diff
ELMO3	0.126771	no diff
CGB1	0.155833	no diff
ID2	0.165405	no diff
GBP4	0.255	no diff
BHLHE41	0.261538	no diff
N4BP3	0.26775	no diff
CGB5	0.335854	no diff
ANKRD30B	0.628605	no diff
CGB	0.628605	no diff
BMF	0.776591	no diff
LBH	0.838667	no diff
PDGFB	0.842609	no diff
SKIL	0.846383	no diff
B3GALT5	0.874286	no diff
PMEPA1	0.874286	no diff
UCN2	0.9588	no diff
CXCL1	0.98	no diff
CTB-60B18.6		not available
EVA1B		not available
FAM221A		not available
GOLGA8Q		not available
GOLGA8S		not available

## Sheet: T-47D
Gene	Adj. P-value (BH)	Predicts poor survival
RASGRP1	0.000224	Low expression
CISH	0.000322	Low expression
HOXB9	0.00119	Low expression
ASPHD2	0.00119	Low expression
EDN2	0.001792	Low expression
KANK2	0.00184	High expression
CDH10	0.00184	High expression
ABCA1	0.001925	High expression
IL1R1	0.00295556	High expression
MORN3	0.00518	Low expression
HECA	0.00878182	High expression
ATOH8	0.014	High expression
RHOU	0.014	High expression
PLD6	0.014	High expression
RASGEF1B	0.014	High expression
C20orf112	0.0172941	Low expression
SMAD6	0.0172941	High expression
GPRIN1	0.0202222	Low expression
KCNB1	0.0206316	High expression
EFNB2	0.021	High expression
ZNF503	0.0222727	High expression
ST3GAL5	0.0222727	High expression
LYPD6	0.0231538	High expression
NOG	0.0231538	High expression
ZFPM1	0.0231538	Low expression
MAP3K5	0.0231538	High expression
DLL1	0.0233333	High expression
KCNC4	0.024	High expression
MTERFD2	0.0251034	High expression
ID3	0.0275625	High expression
TYRO3	0.0275625	High expression
SAMD11	0.0275625	Low expression
RGPD6	0.0305455	High expression
FGD5	0.0308824	High expression
ZBED1	0.0316	Low expression
NAT8L	0.0325405	High expression
NUAK1	0.0325405	High expression
RGPD8	0.0342632	High expression
SLFN5	0.0351795	High expression
F7	0.0385	Low expression
DLX3	0.04	Low expression
SMAD9	0.04	High expression
DEFB132	0.0455814	High expression
SPHK1	0.0477273	Low expression
BMPR1A	0.0486957	High expression
RAPGEF5	0.0486957	High expression
RAPGEF2	0.0506383	no diff
AQP1	0.0532	no diff
FRMD6	0.0532	no diff
S100A14	0.0532	no diff
CA13	0.054902	no diff
NR3C1	0.0565385	no diff
SAMD1	0.0581132	no diff
AKAP5	0.0585455	no diff
PTPRCAP	0.0585455	no diff
ID1	0.0614035	no diff
TNFRSF11A	0.0614035	no diff
FGFR3	0.0627586	no diff
GPRC5A	0.0688136	no diff
BMP8A	0.0711475	no diff
RGPD5	0.0711475	no diff
CDKN1A	0.0722581	no diff
HOXC13	0.0733333	no diff
RGPD1	0.0765625	no diff
GPR110	0.0947692	no diff
MRAS	0.099697	no diff
CCDC85A	0.100299	no diff
GATSL1	0.100882	no diff
CYP1A2	0.12	no diff
PGBD5	0.12	no diff
CYP1A1	0.120282	no diff
CTSK	0.1225	no diff
DGAT2	0.12274	no diff
SMAD7	0.128649	no diff
RGL1	0.132533	no diff
RND1	0.138158	no diff
RGS9	0.14	no diff
BDKRB2	0.154359	no diff
CCDC19	0.159494	no diff
HEY1	0.1645	no diff
FAM78A	0.183333	no diff
FOS	0.183333	no diff
IGFBP3	0.183333	no diff
RASL11A	0.183333	no diff
GRHL3	0.195349	no diff
ID2	0.195349	no diff
SH3RF1	0.241379	no diff
SSTR2	0.270455	no diff
DNAJC6	0.276923	no diff
MSN	0.276923	no diff
SPRY4	0.276923	no diff
ZNF827	0.304348	no diff
DENND5B	0.312766	no diff
FLT1	0.312766	no diff
BCOR	0.335417	no diff
SHISA2	0.335417	no diff
PSPN	0.342857	no diff
SLC34A3	0.342857	no diff
RHOBTB3	0.353535	no diff
TCF7	0.364	no diff
PDE4A	0.388119	no diff
EGLN3	0.411765	no diff
CBFA2T3	0.457692	no diff
INHBE	0.457692	no diff
CDYL2	0.501887	no diff
SIX1	0.501887	no diff
FZD1	0.518519	no diff
GATA2	0.518519	no diff
SLC16A8	0.53945	no diff
CHST3	0.56	no diff
FAM122C	0.592793	no diff
BAMBI	0.59469	no diff
FOXO1	0.59469	no diff
CASZ1	0.614035	no diff
CHN1	0.62087	no diff
NEDD9	0.639655	no diff
PHEX	0.646154	no diff
SPSB1	0.676271	no diff
TSSK2	0.694118	no diff
C10orf82	0.735	no diff
RCAN3	0.740496	no diff
DLX2	0.7504	no diff
DUSP2	0.7504	no diff
BMF	0.7504	no diff
STON2	0.7504	no diff
CRISPLD2	0.76063	no diff
ZNF805	0.76063	no diff
OVOL1	0.7875	no diff
FAM84B	0.792248	no diff
MYLK	0.807692	no diff
FURIN	0.816667	no diff
HES1	0.816667	no diff
SKIL	0.821053	no diff
FRAT1	0.825373	no diff
LEKR1	0.871111	no diff
HOXB6	0.89927	no diff
LIN7B	0.89927	no diff
NKX1-2	0.963768	no diff
ANKRD1	0.99	no diff
ZNF620	0.99	no diff
AL050303.1		not available
AL645608.1		not available
AP5B1		not available
C15orf65		not available
MOB3B		not available
RGPD2		not available
RP11-1055B8.7		not available
RP11-849H4.2		not available
TEX40		not available
